# Supplementary material for: Characteristics of Idiopathic Sensory Processing Disorder in Young Children
Source: Frontiers journal article supplement (doi:10.3389/fnint.2021.647928), 2021-04-28
Supplement: Data_Sheet_1.PDF [file Data_Sheet_1.PDF]

## Appendix

### Assignment of Sensory Processing Disorder Type Ratings based on Sensory Profile (SP) Scores

| SPD Rating                                    | Sensory Over-responsivity                                                                                                                                                                                                   | Sensory Under-responsivity                                                                              | Sensory Craving                                                                           | Sensory Discrimination Disorder                                                                                                                                                            | Sensory-based Motor Disorder                                                                                                                                         |
|-----------------------------------------------|-----------------------------------------------------------------------------------------------------------------------------------------------------------------------------------------------------------------------------|---------------------------------------------------------------------------------------------------------|-------------------------------------------------------------------------------------------|--------------------------------------------------------------------------------------------------------------------------------------------------------------------------------------------|----------------------------------------------------------------------------------------------------------------------------------------------------------------------|
| 0-pattern not present or typical              | SP score typical (within 1 SD from mean) for Sensory Avoiding and Sensory Sensitivity patterns                                                                                                                              | SP in the typical range (within 1 SD) for the Sensory Registration pattern                              | SP in the typical range (within 1 SD from mean ) for Sensory Seeking                      | SP sensory system area scores <sup>1</sup> all fall within the typical range (within 1 SD from mean)                                                                                       | SP scores in the typical range (within 1 SD from mean) for area scores relating to movement, and body position <sup>2</sup>                                          |
| 1-mild, or some indication pattern is present | SP score in the probable difference range (1-2 SD greater than mean) for either Sensory Avoiding or Sensory Sensitivity patterns                                                                                            | SP in the probable difference range (1-2 SD greater than mean) for Sensory Registration                 | SP in the probable difference range (1-2 SD greater than mean) for Sensory Seeking        | A SP sensory system area score within the probable or definite difference range AND rating of one item suggesting a possible sensory discrimination problem                                | SP score in the probable difference range for one area relating movement and body position                                                                           |
| 2- definite indication pattern is present     | SP score in the definite difference range (more than 2SD from mean) for Sensory Avoiding and/or Sensory Sensitivity OR SP score in the probable difference range for both Sensory Avoiding and Sensory Sensitivity patterns | SP in the definite difference range (more than 2 SD greater than mean) for Sensory Registration pattern | SP in the definite difference range (more than 2SD greater than mean) for Sensory Seeking | A SP sensory area score falling within the probable or definite difference range AND the rating of more than one item within the area suggesting a possible sensory discrimination problem | 2- more than one score in the probable difference range in areas relating to movement and body position, or at least one score falling the definite difference range |

<sup>1</sup> SP Sensory System Area Scores: Touch (tactile), Visual, Auditory, Movement or Vestibular, Body Position, Multisensory

<sup>2</sup> SP scores related to SBMD: Vestibular Processing, Movement, Body Position, Sensory Processing Related to Endurance/Tone, Modulation Related to Body Position and Movement
